# Supplementary material
Source: publisher figshare collection journal article supplement (https://gsapubs.figshare.com/ndownloader/files/24125576)
Supplement: Supplementary file 1 [file 24125576]

## Sheet: Table S3
Table S3. TABULATED 40Ar/39Ar RESULTS OF THE BASALTS OF TENNANT, DRY LAKE AND HAMMOND CROSSING
Sample number: B17DD070 (groundmass from the basalt of Tennant)
Temperature (°C)	Age (ka)	%40Ar*	K/Ca	K/Cl	moles 40Ar*	∑39Ar	40Ar	39Ar	38Ar	37Ar	36Ar
450	1494.9 ± 712.8	4.84	0.2	-119	5.669e-16	0.01	0.164450 ± 0.000384	0.002077 ± 0.000032	0.000051 ± 0.000029	0.005379 ± 0.001385	0.000526 ± 0.000013
550	551.8 ± 158.5	2.49	0.11	-268	1.606e-15	0.06	0.908319 ± 0.000676	0.015970 ± 0.000065	0.000511 ± 0.000078	0.074597 ± 0.002287	0.002988 ± 0.000022
650	247.6 ± 82.7	1.63	0.08	-2870	1.736e-15	0.19	1.493428 ± 0.000624	0.038523 ± 0.000086	0.001374 ± 0.000063	0.239513 ± 0.002186	0.004988 ± 0.000027
750	333.2 ± 48.8	3.8	0.06	3635	3.623e-15	0.4	1.339335 ± 0.000516	0.059838 ± 0.000128	0.001675 ± 0.000054	0.514764 ± 0.003041	0.004460 ± 0.000025
850	269.4 ± 37.6	4.14	0.04	2446	2.889e-15	0.6	0.981705 ± 0.000513	0.059161 ± 0.000095	0.001487 ± 0.000037	0.740800 ± 0.005246	0.003360 ± 0.000018
950	117.4 ± 57.9	1.64	0.03	2830	1.008e-15	0.77	0.864817 ± 0.000678	0.047545 ± 0.000116	0.001248 ± 0.000034	0.808723 ± 0.004128	0.003076 ± 0.000023
1050	325.7 ± 84.9	2.6	0.03	597	1.616e-15	0.86	0.874525 ± 0.000909	0.027523 ± 0.000067	0.001103 ± 0.000038	0.555126 ± 0.005449	0.003009 ± 0.000019
1150	329.0 ± 164.8	1.24	0.04	426	1.138e-15	0.93	1.290724 ± 0.000528	0.019110 ± 0.000059	0.001246 ± 0.000040	0.264722 ± 0.002195	0.004344 ± 0.000027
1250	478.6 ± 192.5	1.43	0.03	277	1.223e-15	0.97	1.194053 ± 0.000573	0.014041 ± 0.000060	0.001142 ± 0.000037	0.227676 ± 0.002924	0.004006 ± 0.000023
1350	334.2 ± 334.4	0.75	0.01	252	4.637e-16	1	0.864392 ± 0.000468	0.007967 ± 0.000054	0.000784 ± 0.000040	0.534151 ± 0.003964	0.003023 ± 0.000022
Packet IRR366-BE, Experiment #18Z0031, 0.1582 g groundmass basalt, all errors ± 1 sigma
J = 0.000215708 ± 2.77E-07
40Ar* is radiogenic argon, isotopes in volts (7.12E-14 moles/volt), corrected for blank, background, discrimination, and decay
Calculated bulk K/Ca = 3.823E-2 ± 1.457E-2, Calculated K2O = 0.23% wt., Calculated CaO = 7.43% wt., Calculated Cl = 0.1 ppm
Total Gas Age = 300.2 ± 28.1 ka
Weighted Mean Plateau Age = 272.5 ± 30.6 ka (± 1 sigma, including ± J), 99.3% 39Ar released
Weighted Mean Plateau Age = 272.5 ± 23.4 ka (a priori, including ± J), 99.3% 39Ar released
Weighted Mean Plateau Age = 272.5 ± 70.5 ka (95% confidence, including ± J)
MSWD = 1.70 (Good fit, MSWD <2.19)
Steps 9 of 10 (550, 650, 750, 850, 950, 1050, 1150, 1250, 1350°C)
Isochron Age = 200.2 ± 56.7 ka (± 1 sigma, including ± J)
Isochron Age = 200.2 ± 46.0 ka (a priori, including ± J)
Isochron Age = 200.2 ± 134.2 ka (95% confidence, including ± J)
MSWD = 1.52 (Good fit, MSWD <2.29)
40Ar/36Ar intercept = 300.8 ± 1.6 (± 1 sigma)
40Ar/36Ar intercept = 300.8 ± 1.3 (a priori)
40Ar/36Ar intercept = 300.8 ± 3.7 (95% confidence)
Steps 9 of 10 (550, 650, 750, 850, 950, 1050, 1150, 1250, 1350°C)
Sample number: B16DD053 (groundmass from the basalt of Dry Lake)
Temperature (°C)	Age (ka)	%40Ar*	K/Ca	K/Cl	moles 40Ar*	∑39Ar	40Ar	39Ar	38Ar	37Ar	36Ar
550	231.6 ± 167.3	2.18	0.03	-2114	4.62e-16	0.03	0.297326 ± 0.000472	0.011197 ± 0.000055	0.000311 ± 0.000027	0.192871 ± 0.000478	0.001028 ± 0.000016
650	426.9 ± 79.8	5.67	0.03	-4452	2.085e-15	0.12	0.517106 ± 0.000459	0.027444 ± 0.000069	0.000652 ± 0.000039	0.527661 ± 0.002054	0.001782 ± 0.000018
750	324.0 ± 39.1	6.52	0.02	5194	3.966e-15	0.33	0.854721 ± 0.000457	0.068960 ± 0.000111	0.001500 ± 0.000032	1.574552 ± 0.001655	0.003118 ± 0.000020
850	324.1 ± 47.9	6.05	0.02	1776	3.732e-15	0.52	0.867661 ± 0.000360	0.064853 ± 0.000140	0.001551 ± 0.000035	1.439924 ± 0.003440	0.003135 ± 0.000024
950	185.9 ± 66.9	2.12	0.03	1007	1.408e-15	0.65	0.931455 ± 0.000418	0.042537 ± 0.000087	0.001327 ± 0.000035	0.786090 ± 0.001948	0.003274 ± 0.000023
1050	259.7 ± 63.7	3.27	0.05	614	1.987e-15	0.78	0.853336 ± 0.000494	0.042726 ± 0.000081	0.001385 ± 0.000047	0.449920 ± 0.001330	0.002891 ± 0.000023
1150	316.0 ± 75.6	3.03	0.04	313	2.112e-15	0.89	0.980742 ± 0.000494	0.037439 ± 0.000084	0.001608 ± 0.000027	0.550962 ± 0.002539	0.003340 ± 0.000023
1250	735.9 ± 153.7	3.94	0.01	462	3.152e-15	0.97	1.125442 ± 0.000409	0.025194 ± 0.000071	0.001277 ± 0.000043	2.048098 ± 0.002652	0.004197 ± 0.000028
1350	889.3 ± 210.6	5.53	0.01	488	1.684e-15	1	0.428460 ± 0.000307	0.011154 ± 0.000055	0.000514 ± 0.000043	0.925515 ± 0.001749	0.001616 ± 0.000018
Packet IRR363-XK, Experiment #17Z0173, 0.2192 g groundmass basalt, all errors ± 1 sigma
J = 0.000218608384 ± 2.74E-07
40Ar* is radiogenic argon, isotopes in volts (7.12E-14 moles/volt), corrected for blank, background, discrimination, and decay
Calculated bulk K/Ca = 2.010E-2 ± 7.913E-3, Calculated K2O = 0.19% wt., Calculated CaO = 11.33% wt., Calculated Cl = 0.2 ppm
Total Gas Age = 350.6 ± 24.3 ka
Weighted Mean Plateau Age = 305.8 ± 23.9 ka (± 1 sigma, including ± J), 89.5% 39Ar released
Weighted Mean Plateau Age = 305.8 ± 22.8 ka (a priori, including ± J), 89.5% 39Ar released
Weighted Mean Plateau Age = 305.8 ± 56.6 ka (95% confidence, including ± J)
MSWD = 1.10 (Good fit, MSWD <2.40)
Steps 7 of 9 (550, 650, 750, 850, 950, 1050, 1150°C)
Isochron Age = 385.0 ± 80.4 ka (± 1 sigma, including ± J)
Isochron Age = 385.0 ± 76.9 ka (a priori, including ± J)
Isochron Age = 385.0 ± 196.8 ka (95% confidence, including ± J)
MSWD = 1.09 (Good fit, MSWD <2.56)
40Ar/36Ar intercept = 294.8 ± 3.6 (± 1 sigma)
40Ar/36Ar intercept = 294.8 ± 3.4 (a priori)
40Ar/36Ar intercept = 294.8 ± 8.8 (95% confidence)
Steps 7 of 9 (550, 650, 750, 850, 950, 1050, 1150°C)
Sample number: B15DD005B (groundmass from the basalt of Hammond Crossing)
Temperature (°C)	Age (ka)	%40Ar*	K/Ca	K/Cl	moles 40Ar*	∑39Ar	40Ar	39Ar	38Ar	37Ar	36Ar
550	11.2 ± 302.2	0.13	0.05	-742	9.893e-18	0.01	0.049841 ± 0.000112	0.002480 ± 0.000024	0.000051 ± 0.000012	0.028436 ± 0.000367	0.000176 ± 0.000006
625	372.0 ± 43.3	9.7	0.04	9591	3.638e-15	0.1	0.253296 ± 0.000191	0.027579 ± 0.000044	0.000528 ± 0.000017	0.367362 ± 0.001035	0.000877 ± 0.000009
675	302.9 ± 32.7	11.06	0.04	-3253	3.859e-15	0.22	0.235765 ± 0.000158	0.035946 ± 0.000045	0.000570 ± 0.000020	0.496663 ± 0.001197	0.000849 ± 0.000009
725	295.0 ± 28.7	12.25	0.04	-34422	3.624e-15	0.34	0.199832 ± 0.000194	0.034668 ± 0.000053	0.000574 ± 0.000018	0.481054 ± 0.001473	0.000728 ± 0.000007
775	233.8 ± 34.7	8.5	0.04	4436	2.465e-15	0.44	0.195901 ± 0.000161	0.029719 ± 0.000043	0.000541 ± 0.000018	0.374415 ± 0.001018	0.000712 ± 0.000008
825	307.0 ± 36.8	9.48	0.05	3949	3.002e-15	0.53	0.213954 ± 0.000196	0.027531 ± 0.000052	0.000521 ± 0.000014	0.306037 ± 0.000870	0.000741 ± 0.000008
875	183.7 ± 48.7	4.4	0.06	2176	1.469e-15	0.6	0.225498 ± 0.000239	0.022488 ± 0.000055	0.000481 ± 0.000015	0.211628 ± 0.000919	0.000789 ± 0.000009
950	368.6 ± 45.6	7.09	0.06	1217	3.502e-15	0.69	0.333572 ± 0.000282	0.026692 ± 0.000078	0.000645 ± 0.000022	0.217499 ± 0.000537	0.001110 ± 0.000010
1025	343.1 ± 37.0	8.73	0.08	948	3.211e-15	0.78	0.248536 ± 0.000161	0.026278 ± 0.000049	0.000611 ± 0.000020	0.178745 ± 0.000880	0.000818 ± 0.000008
1100	281.1 ± 40.3	7.19	0.08	702	2.811e-15	0.88	0.264015 ± 0.000150	0.028060 ± 0.000046	0.000699 ± 0.000021	0.185715 ± 0.000453	0.000881 ± 0.000009
1175	327.2 ± 67.7	3.69	0.02	324	2.508e-15	0.95	0.458576 ± 0.000181	0.021803 ± 0.000041	0.000862 ± 0.000027	0.560846 ± 0.001603	0.001652 ± 0.000011
1250	475.0 ± 150.6	3.61	0	1065	1.57e-15	0.98	0.293981 ± 0.000133	0.009927 ± 0.000035	0.000370 ± 0.000016	0.978570 ± 0.001250	0.001234 ± 0.000010
1350	422.3 ± 187.5	2.76	0.01	1091	9.367e-16	1	0.229312 ± 0.000177	0.006542 ± 0.000029	0.000263 ± 0.000016	0.486903 ± 0.000957	0.000891 ± 0.000009
Packet IRR345-KR, Experiment #16Z0037, 0.2027 g groundmass basalt, all errors ± 1 sigma
J = 0.0002291898824 ± 2.549417E-07
40Ar* is radiogenic argon, isotopes in volts (1.48E-13 moles/volt), corrected for blank, background, discrimination, and decay
Calculated bulk K/Ca = 3.189E-2 ± 1.050E-2, Calculated K2O = 0.37% wt., Calculated CaO = 14.19% wt., Calculated Cl = 0.3 ppm
Total Gas Age = 307.5 ± 13.5 ka
Weighted Mean Plateau Age = 300.4 ± 15.2 ka (± 1 sigma, including ± J), 100.0% 39Ar released
Weighted Mean Plateau Age = 300.4 ± 12.1 ka (a priori, including ± J), 100.0% 39Ar released
Weighted Mean Plateau Age = 300.4 ± 33.5 ka (95% confidence, including ± J)
MSWD = 1.57 (Good fit, MSWD <1.94)
Steps 13 of 13 (550, 625, 675, 725, 775, 825, 875, 950, 1025, 1100, 1175, 1250,1350°C)
Isochron Age = 259.7 ± 34.3 ka (± 1 sigma, including ± J)
Isochron Age = 259.7 ± 27.8 ka (a priori, including ± J)
Isochron Age = 259.7 ± 76.3 ka (95% confidence, including ± J)
MSWD = 1.52 (Good fit, MSWD <1.99)
40Ar/36Ar intercept = 298.9 ± 2.7 (± 1 sigma)
40Ar/36Ar intercept = 298.9 ± 2.2 (a priori)
40Ar/36Ar intercept = 298.9 ± 6.1 (95% confidence)
Steps 13 of 13 (550, 625, 675, 725, 775, 825, 875, 950, 1025, 1100, 1175, 1250, 1350°C)
Sample number: LM16-5025 (groundmass from the basalt of Hammond Crossing)
Temperature (°C)	Age (ka)	%40Ar*	K/Ca	K/Cl	moles 40Ar*	∑39Ar	40Ar	39Ar	38Ar	37Ar	36Ar
550	151.7 ± 544.4	1.64	0.04	-67	7.906e-17	0.01	0.067707 ± 0.000673	0.002911 ± 0.000045	-0.000103 ± 0.000027	0.039337 ± 0.000931	0.000234 ± 0.000013
650	354.0 ± 89.8	3.5	0.04	-234	2.106e-15	0.07	0.846341 ± 0.001898	0.033251 ± 0.000161	0.000357 ± 0.000075	0.492512 ± 0.005965	0.002874 ± 0.000024
750	286.1 ± 33.5	5.62	0.04	-1676	4.444e-15	0.24	1.110691 ± 0.000878	0.086795 ± 0.000144	0.001606 ± 0.000051	1.257700 ± 0.002387	0.003864 ± 0.000023
850	346.5 ± 35.0	8.77	0.04	-9807	6.046e-15	0.43	0.968951 ± 0.000486	0.097444 ± 0.000165	0.001823 ± 0.000034	1.325403 ± 0.002416	0.003333 ± 0.000027
950	354.6 ± 53.0	3.82	0.04	1976	4.191e-15	0.56	1.542987 ± 0.000624	0.065970 ± 0.000119	0.001958 ± 0.000031	0.847813 ± 0.001288	0.005209 ± 0.000029
1050	404.2 ± 55.5	4.29	0.06	1311	4.045e-15	0.67	1.314356 ± 0.000593	0.055327 ± 0.000110	0.001707 ± 0.000040	0.515134 ± 0.001876	0.004358 ± 0.000026
1150	255.2 ± 39.3	4.56	0.06	958	3.525e-15	0.82	1.086523 ± 0.000649	0.076871 ± 0.000127	0.002017 ± 0.000029	0.666535 ± 0.000842	0.003660 ± 0.000025
1250	333.6 ± 53.0	4.08	0.02	503	3.955e-15	0.95	1.353674 ± 0.000563	0.066379 ± 0.000115	0.002283 ± 0.000072	1.777930 ± 0.002874	0.004848 ± 0.000027
1350	523.3 ± 142.4	5.17	0.01	1664	1.981e-15	0.99	0.538781 ± 0.000315	0.021853 ± 0.000087	0.000691 ± 0.000037	1.286952 ± 0.001446	0.002073 ± 0.000024
1450	566.9 ± 389.1	5.63	0.01	6420	4.91e-16	1	0.122495 ± 0.000238	0.004963 ± 0.000059	0.000147 ± 0.000027	0.243645 ± 0.001762	0.000456 ± 0.000016
Packet IRR363-XQ, Experiment #17Z0182, 0.2301 g groundmass basalt, all errors ± 1 sigma
J = 0.000218149545 ± 2.56E-07
40Ar* is radiogenic argon, isotopes in volts (7.12E-14 moles/volt), corrected for blank, background, discrimination, and decay
Calculated bulk K/Ca = 3.139E-2 ± 1.178E-2, Calculated K2O = 0.28% wt., Calculated CaO = 10.78% wt., Calculated Cl = 3.3E-2 ppm
Total Gas Age = 336.9 ± 18.0 ka
Weighted Mean Plateau Age = 322.6 ± 17.4 ka (± 1 sigma, including ± J), 100.0% 39Ar released
Weighted Mean Plateau Age = 322.6 ± 16.7 ka (a priori, including ± J), 100.0% 39Ar released
Weighted Mean Plateau Age = 322.6 ± 40.2 ka (95% confidence, including ± J)
MSWD = 1.09 (Good fit, MSWD <2.11)
Steps 10 of 10 (550, 650, 750, 850, 950, 1050, 1150, 1250, 1350, 1450°C)
Isochron Age = 244.5 ± 51.1 ka (± 1 sigma, including ± J)
Isochron Age = 244.5 ± 51.1 ka (a priori, including ± J)
Isochron Age = 244.5 ± 120.8 ka (95% confidence, including ± J)
MSWD = 0.89 (Good fit, MSWD <2.19)
40Ar/36Ar intercept = 302.4 ± 2.4 (± 1 sigma)
40Ar/36Ar intercept = 302.4 ± 2.4 (a priori)
40Ar/36Ar intercept = 302.4 ± 5.7 (95% confidence)
Steps 10 of 10 (550, 650, 750, 850, 950, 1050, 1150, 1250, 1350, 1450°C)

## Sheet: G48076
Downs, D.T., et al., 2020, Simultaneous Middle Pleistocene eruption of three widespread tholeiitic basalts in northern California (USA): Insights into crustal magma transport in an actively extending back arc: Geology, v. 48, https://doi.org/10.1130/G48076.1
